# Supplementary material for: Carbon dots and AIE molecules for highly efficient tandem luminescent solar concentrators
Source: Royal Society of Chemistry journal article supplement (doi:10.1039/c9cc02676b), 2019-01-01
Supplement: c9cc02676b1.pdf [file c9cc02676b1.pdf]

## Supporting Information

### Carbon dots and AIE molecules for highly efficient tandem luminescent solar concentrators

Wenwen Ma <sup>a</sup>, Wenjing Li <sup>a</sup>, Ruiyuan Liu <sup>b</sup>, Mengyan Cao <sup>a</sup>, Xiujuan Zhao <sup>a</sup>, Xiao Gong <sup>\*a</sup>

a. State Key Laboratory of Silicate Materials for Architectures, Wuhan University of Technology, Wuhan 430070, China. E-mail: [xgong@whut.edu.cn](mailto:xgong@whut.edu.cn)

b. School of Biomedical Engineering, Southern Medical University, Guangzhou 510515, China.

#### 1. EXPERIMENTAL

##### 1.1 Preparation of N-CDs

N-CDs were synthesized through a simple, convenient and one step method. The preparation was referred to our previous report.<sup>1</sup> Briefly, 3.0 g of citric acid and 2.0 g of urea were added to 10 mL ultrapure water to form a transparent solution under stirring. Then, the solution was transferred to the microwave oven (800 W) and heated for 5 min. The colorless clear reaction solution would become brown solution and finally a clustered

solid. The resulting N-CDs were left to cool, diluted with water and then with a dialysis membrane filter (0.22  $\mu\text{m}$ ) in order to eliminate suspended impurities.

## 1.2 Preparation of TPFE-Rho

TPFE-Rho was prepared following the synthetic procedure reported in the literature.<sup>2</sup> First, Rhodanic-CN and TPFE-CHO were prepared. Then, 1.21 g of Rhodanic-CN, 1.75 g of TPFE-CHO, 0.5 g of ammonium acetate and 30 mL acetic acid were loaded into a three-neck refluxed overnight. The crude precipitate was washed by repeated precipitation with  $\text{CH}_3\text{OH}$  and finally recrystallized from  $\text{CH}_2\text{Cl}_2$  and ethanol to give TPFE-Rho as a brick-red solid. The chemical structure of TPFE-Rho is showed in Fig. S1.

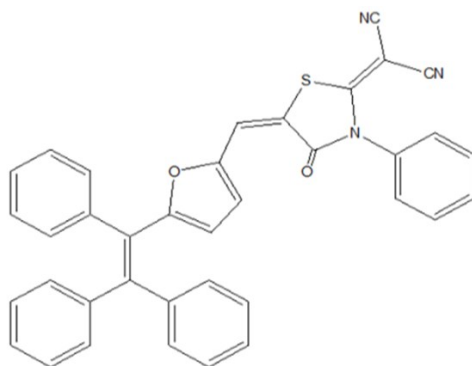

Fig. S1. Chemical structure of TPFE-Rho.

## 1.3 Device fabrication

### 1.3.1 Preparation of N-CDs/PVP thin film on a glass substrate

The glass substrates were cut into dimensions 2.0 cm  $\times$  2.5 cm, 2.0 cm  $\times$  4.5 cm, 2.0 cm  $\times$  6.5 cm and polished around the edges, and then cleaned with acetone, ethanol, and deionized water by ultrasonic cleaning for 30 minutes, respectively. The N-CDs dispersed in ethanol were mixed with PVP polymer with a final concentration of PVP of 400 mg/mL. The concentration of C-dots is around 10 mg/mL. These N-CDs/polymer

were then spin-coated on glass substrates with a speed of 1000 rpm and an acceleration rate of 1500 rpm, respectively. To gain different thin film thicknesses, spin-coating with various times was employed. Finally, the thin film was dried in heating plate at 60 °C.

### 1.3.2 Preparation of TPFE-Rho/PMMA nanocomposite slabs

PMMA nanocomposite slabs were prepared by bulk polymerization of MMA in the presence of thermal radical initiator (AIBN). First, a blend of 20 mL of MMA monomer with 2.62 g of PMMA polymer was heated to 60 °C on a magnetic stirrer until the PMMA granules were dissolved completely. The blend was stirred vigorously for 1h at 60 °C. 0.05 g of AIBN dissolved in 5 mL MMA monomer was added to the blend of MMA and PMMA. This blend solution was stirred and heated at 60 °C for 4 h. TPFE-Rho (0.08 wt%) dispersed in 3 mL THF were added drop by drop to the blend of MMA and PMMA and the mixture was stirred for 10min (60 °C) to form a homogeneous TPFE-Rho/polymer slurry of appropriate viscosity, respectively. Then, the mixture was transferred into a casting mold. The casting mold was consisted of two glass plates with a silicone rubber between them, which were held firmly by steel clamps. The casting molds filled with N-CDs/polymer slurry were placed in the oven at 50 °C for 16 h to complete curing. Finally, the TPFE-Rho/PMMA nanocomposite slabs were cut into dimensions 2.0 cm × 2.5 cm × 0.2 cm, 2.0 cm × 4.5 cm × 0.2 cm, 2.0 cm × 6.5 cm × 0.2 cm and polished around the edges.

## 2. CHARACTERIZATION

UV-visible absorption spectra were recorded with a UV-Vis spectrophotometer (UV2600, Shimadzu Corp., Tokyo, Japan). Photoluminescence (PL) spectra were

measured at room temperature with a time-resolved fluorescence spectrometer (FL3-22; Jobin-Yvon, USA). Morphology of the N-CDs/PVP thin film was observed with a field-emission scanning electron microscope (FESEM, S-4800, HITACHI, Japan). PL lifetime of the TPFE-Rho in solution and in the PMMA polymer matrix was measured using a pulsed laser diode of 470 nm and Time-Correlated Single Photon Counting (TCSPC) mode in the Fluorolog-3 system. Fluorescence quantum yield (QY) was measured with UV-NIR absolute PL quantum yield spectrometer (HAMAMATSU, C13534). Photovoltaic properties of the TPFE-Rho/PMMA nanocomposite slabs and N-CDs/PVP thin film LSCs were obtained with a solar simulator (IV4112, Newport Corp., Irvine, CA, USA) at an intensity of  $100 \text{ mW}\cdot\text{cm}^{-2}$  (1 sun).

### 3. RESULTS

Table S1 Photovoltaic parameters of the tandem LSCs.

| Luminophore | LSC size<br>( $\text{cm}^3$ ) | $J_{SC}$<br>( $\text{mA}/\text{cm}^2$ ) | $V_{OC}$<br>(V) | Fill Factor<br>(%) | $G$ | $\eta_{opt}$<br>(%) | $\eta$<br>(%) | Tandem<br>LSC<br>$\eta$ (%) |
|-------------|-------------------------------|-----------------------------------------|-----------------|--------------------|-----|---------------------|---------------|-----------------------------|
| N-CDs       | $2.5 \times 2.0 \times 0.1$   | 5.78                                    | 0.49            | 62.07              | 5.5 | 2.28                | 1.76          | 4.06                        |
| TPFE-Rho    | $2.5 \times 2.0 \times 0.2$   | 6.88                                    | 0.53            | 63.18              | 2.8 | 2.92                | 2.30          |                             |
| N-CDs       | $4.5 \times 2.0 \times 0.1$   | 5.70                                    | 0.48            | 61.89              | 6.9 | 2.05                | 1.69          | 3.89                        |
| TPFE-Rho    | $4.5 \times 2.0 \times 0.2$   | 6.87                                    | 0.51            | 62.89              | 3.5 | 2.75                | 2.20          |                             |
| N-CDs       | $6.5 \times 2.0 \times 0.1$   | 5.18                                    | 0.47            | 61.88              | 7.6 | 1.73                | 1.51          | 3.55                        |
| TPFE-Rho    | $6.5 \times 2.0 \times 0.2$   | 6.85                                    | 0.48            | 62.20              | 3.8 | 2.31                | 2.04          |                             |

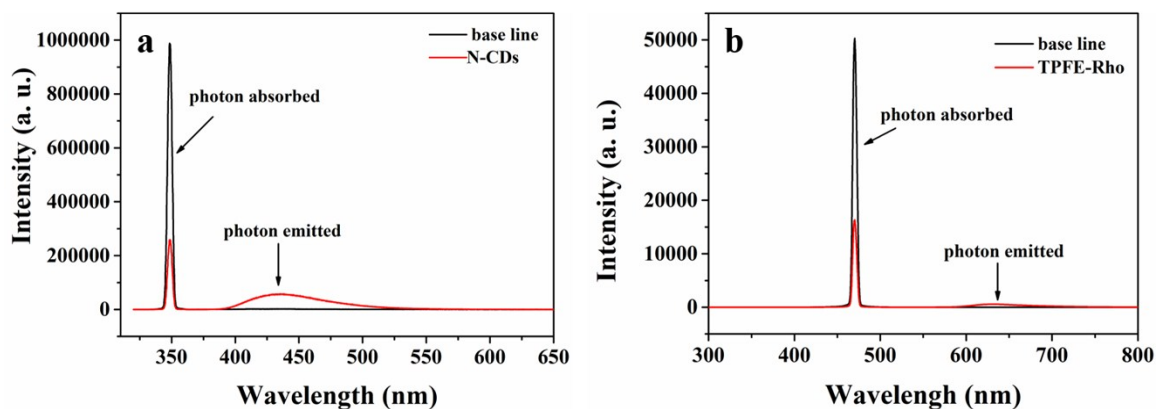

Fig. S2. Experimental data of fluorescence quantum yield measurement for N-CDs (a) and TPFE-Rho (b).

The fluorescence quantum yield (QY) can be determined by the ratio of the integrated areas between the emission and excitation ranges. The absolute QYs of N-CDs and organic nanoparticle TPFE-Rho are  $\Phi_{\text{N-CDs}} = 79.65\%$  and  $\Phi_{\text{TPFE-Rho}} = 34.88\%$ , respectively.

## Reference

S1. Li, Y. X.; Miao, P.; Zhou, W.; Gong, X.; Zhao, X. J., N-doped carbon-dots for luminescent solar concentrators. *J. Mater. Chem. A* **2017**, *5* (40), 21452-21459.

S2. Xia, Q.; Chen, Z. K.; Yu, Z. Q.; Wang, L.; Qu, J. Q.; Liu, R. Y., Aggregation-Induced Emission-Active Near-Infrared Fluorescent Organic Nanoparticles for Noninvasive Long-Term Monitoring of Tumor Growth. *ACS Appl. Mater. Inter.* **2018**, *10* (20), 17081-17088.
